# Supplementary material
Source: Research Square preprint supplement (doi:10.21203/rs.3.rs-9005126/v1)
Supplement: Supplementary file 1 [file 80b395c1e21312ef0ea0b9de.docx]

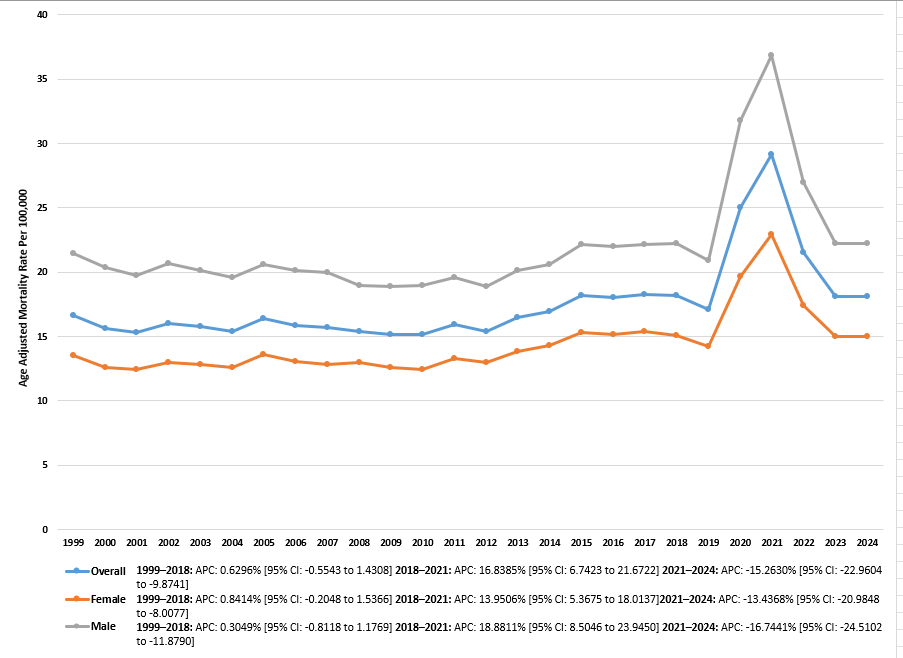


**Supplementary Figure 1**: Trends in Pneumonia and Sepsis-related AAMR per 100,000, stratified by sex, in the United States from 1999-2024.


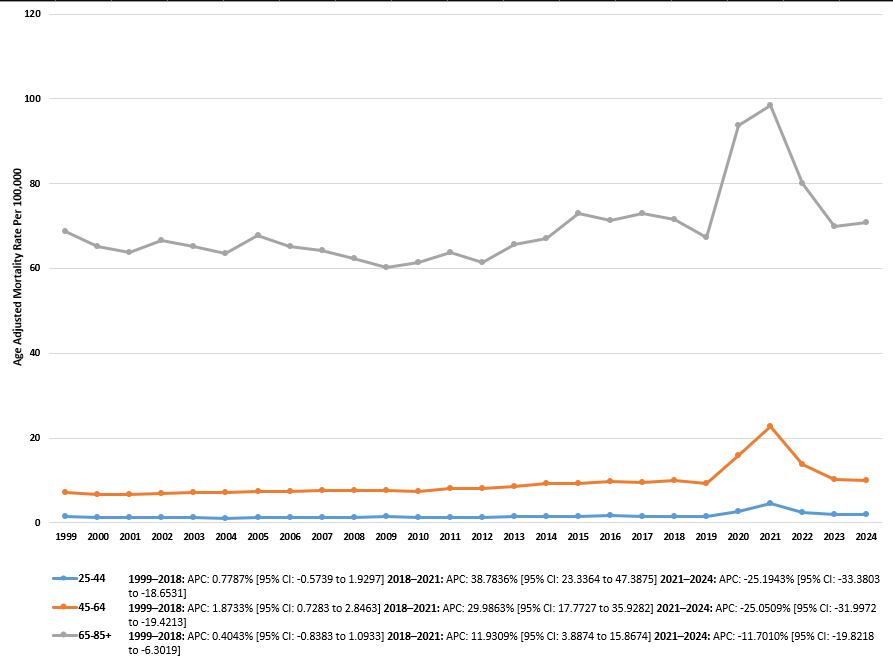


**Supplementary Figure 2**: Trends in Pneumonia and Sepsis-related AAMR per 100,000, stratified by age groups, in the United States from 1999-2024.


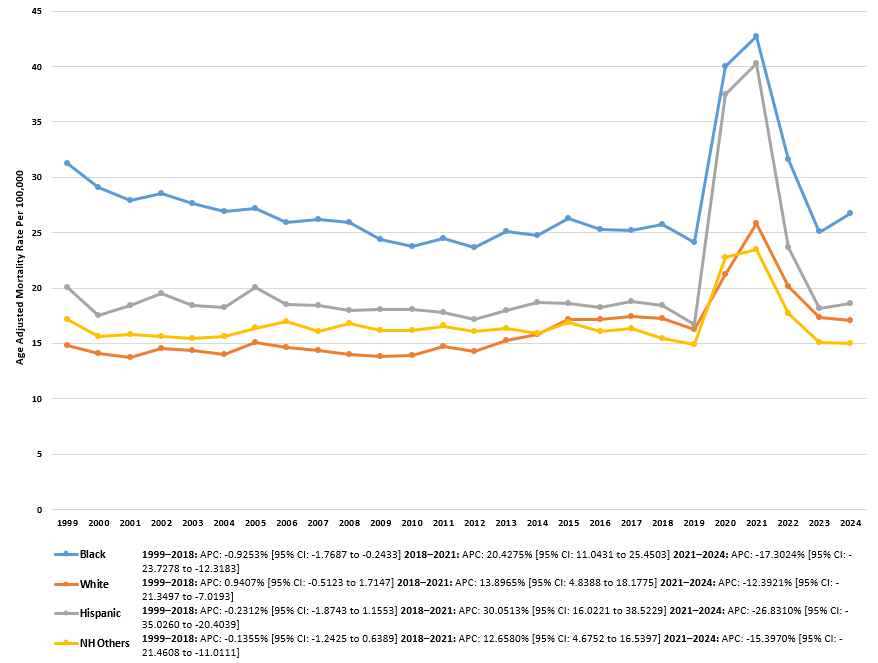


**Supplementary Figure 3**: Trends in Pneumonia and Sepsis-related AAMR per 100,000, stratified by race, in the United States from 1999-2024.


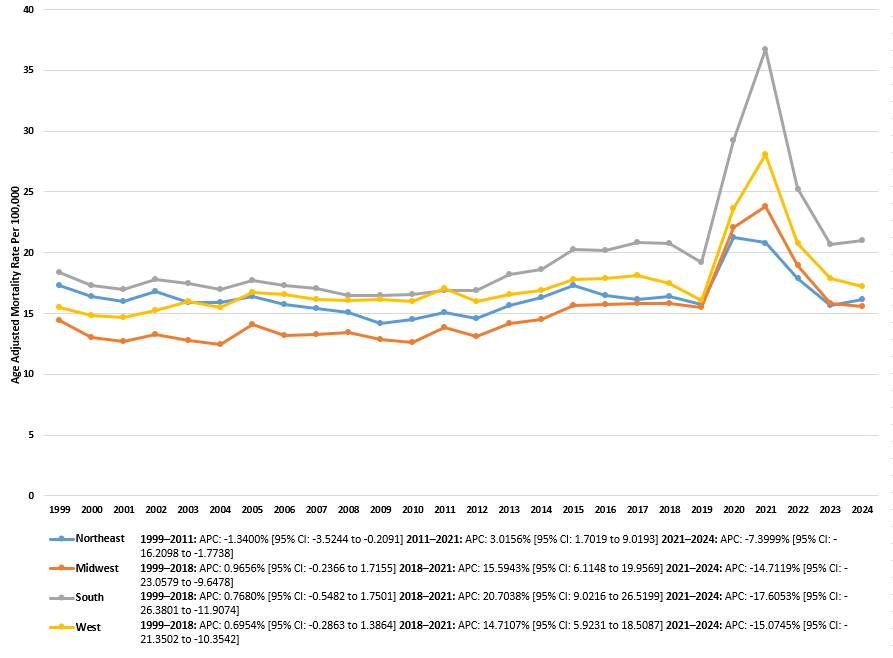


**Supplementary Figure 4**: Trends in Pneumonia and Sepsis-related AAMR per 100,000, stratified by census region, in the United States from 1999-2024.


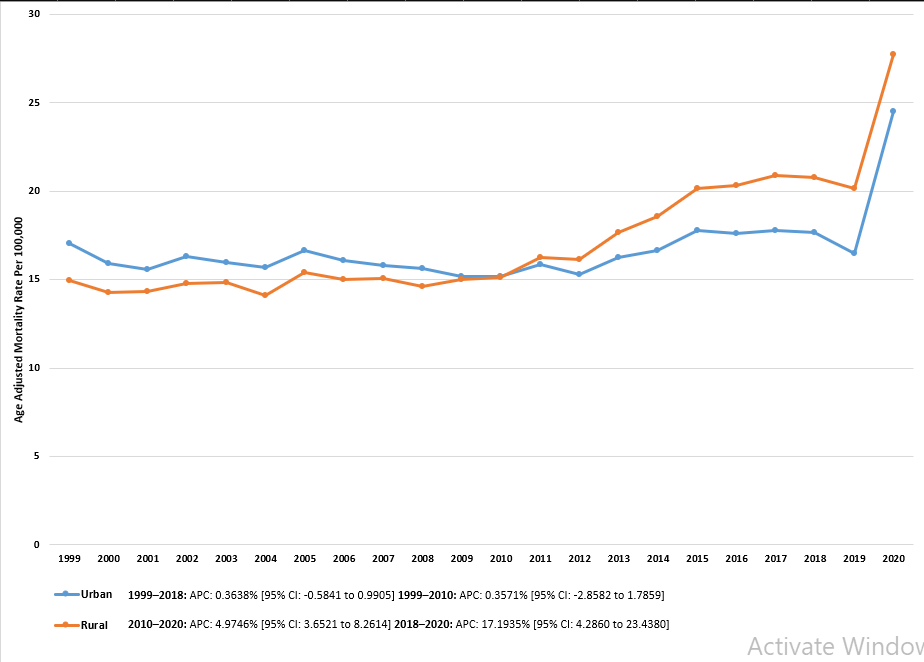


**Supplementary Figure 5**: Trends in Pneumonia and Sepsis-related AAMR per 100,000, stratified by urbanisation, in the United States from 1999-2024.
