# Supplementary material
Source: Research Square preprint supplement (doi:10.21203/rs.3.rs-9005126/v1)
Supplement: Supplementary file 2 [file a1d41a60ed58fc7df5c6c5a7.docx]

| **Supplemental Table 1,Pneumonia related mortalities in Adults with Sepsis , Stratified by Sex and Race, in the United States, 1999 to 2024** | | | | | | | | | |
| --- | --- | --- | --- | --- | --- | --- | --- | --- | --- |
| **Deaths** | | | | | | | | | |
| **Year** | **Overall** | **Women** | **Men** | **NH White** | **NH Black** | **NH Others** | **Hispanic** | **Population** |
| **1999** | 29295 | 14596 | 14699 | 22019 | 4700 | 766 | 1693 | 180408769 |
| **2000** | 27881 | 13737 | 14144 | 21115 | 4354 | 753 | 1550 | 181984640 |
| **2001** | 27778 | 13735 | 14043 | 20884 | 4273 | 786 | 1730 | 184305128 |
| **2002** | 29511 | 14530 | 14981 | 22269 | 4397 | 833 | 1907 | 186208028 |
| **2003** | 29531 | 14527 | 15004 | 22267 | 4353 | 896 | 1924 | 188090429 |
| **2004** | 29333 | 14390 | 14943 | 22014 | 4308 | 929 | 1992 | 190205384 |
| **2005** | 31868 | 15794 | 16074 | 23933 | 4471 | 1062 | 2328 | 192551384 |
| **2006** | 31473 | 15291 | 16182 | 23585 | 4399 | 1137 | 2286 | 195019359 |
| **2007** | 31734 | 15320 | 16414 | 23557 | 4575 | 1154 | 2392 | 197403777 |
| **2008** | 31829 | 15776 | 16053 | 23374 | 4639 | 1273 | 2476 | 199795090 |
| **2009** | 31804 | 15446 | 16358 | 23267 | 4528 | 1286 | 2670 | 202107016 |
| **2010** | 32367 | 15634 | 16733 | 23712 | 4506 | 1361 | 2712 | 203891983 |
| **2011** | 34988 | 17012 | 17976 | 25711 | 4797 | 1493 | 2895 | 206592936 |
| **2012** | 34785 | 16987 | 17798 | 25327 | 4839 | 1522 | 2975 | 208826037 |
| **2013** | 38032 | 18423 | 19609 | 27618 | 5310 | 1696 | 3276 | 211085314 |
| **2014** | 39987 | 19356 | 20631 | 28968 | 5410 | 1767 | 3643 | 213809280 |
| **2015** | 43898 | 21221 | 22677 | 31920 | 5947 | 1990 | 3813 | 216553817 |
| **2016** | 44455 | 21300 | 23155 | 32386 | 5930 | 2010 | 3962 | 218641417 |
| **2017** | 46080 | 22143 | 23937 | 33373 | 6117 | 2156 | 4243 | 221447331 |
| **2018** | 46829 | 22145 | 24684 | 33712 | 6420 | 2154 | 4381 | 223311190 |
| **2019** | 44904 | 21194 | 23710 | 32260 | 6192 | 2180 | 4154 | 224981167 |
| **2020** | 66836 | 29381 | 37455 | 42223 | 10660 | 3565 | 10208 | 226635013 |
| **2021** | 76196 | 32774 | 43422 | 48806 | 11376 | 4184 | 11670 | 228238412 |
| **2022** | 58761 | 26387 | 32374 | 40020 | 8520 | 3314 | 6722 | 229508599 |
| **2023** | 49730 | 22777 | 26953 | 34572 | 6839 | 2925 | 5223 | 231529762 |
| **2024** | 49692 | 22834 | 26858 | 33982 | 7252 | 2879 | 5383 | 231529762 |
| **Total** | **1,039,577** | **492,710** | **546,867** | **742,874** | **149,112** | **46,071** | **98,208** | **5,394,661,024** |
| NH = non-Hispanic. | | | | | | | | | |

| **Supplemental Table 2, Pneumonia related mortalities in Adults with Sepsis, , Stratified by Place of Death in Adults with Sepsis, in the United States, 1999 to 2024** | | | | |
| --- | --- | --- | --- | --- |
| **Deaths** | | | | |
| **Year** | **Medical Facility** | **Nursing Home/Long-term Care Facility** | **Hospice Facility** | **Decendent'sHome** |
| **1999** | 25728 | 2962 |  | 449 |
| **2000** | 24581 | 2756 | - | 388 |
| **2001** | 24721 | 2520 | - | 380 |
| **2002** | 26435 | 2507 | - | 361 |
| **2003** | 26255 | 2469 | 12 | 428 |
| **2004** | 26107 | 2314 | 36 | 458 |
| **2005** | 28196 | 2498 | 145 | 582 |
| **2006** | 28290 | 2132 | 199 | 515 |
| **2007** | 28650 | 1998 | 306 | 483 |
| **2008** | 28306 | 1906 | 374 | 468 |
| **2009** | 27940 | 1783 | 461 | 492 |
| **2010** | 29079 | 1812 | 601 | 524 |
| **2011** | 31354 | 1852 | 746 | 629 |
| **2012** | 30995 | 1854 | 921 | 631 |
| **2013** | 33892 | 1860 | 1077 | 739 |
| **2014** | 35521 | 1977 | 1408 | 732 |
| **2015** | 38366 | 2254 | 2028 | 935 |
| **2016** | 38806 | 2129 | 2087 | 1087 |
| **2017** | 39824 | 2207 | 2519 | 1187 |
| **2018** | 40382 | 2251 | 2555 | 1298 |
| **2019** | 38792 | 1979 | 2469 | 1270 |
| **2020** | 59394 | 2237 | 2725 | 1946 |
| **2021** | 69502 | 1580 | 2516 | 1884 |
| **2022** | 52591 | 1444 | 2437 | 1711 |
| **2023** | 43684 | 1543 | 2473 | 1589 |
| **2024** | 43538 | 1569 | 2615 | 1551 |
| **Total** | **920,929** | **54,393** | **30,710** | **22,717** |

| **Supplemental Table 3, Annual percent change (APC) of Pneumonia related Age-Adjusted Mortality Rates per 100,000 in Adults with Sepsis, in the United States, 1999 to 2024** | | |
| --- | --- | --- |
| **Year Interval** | **APC (95% CI)** | **P-value** |
| **Overall** | | |
| 1999–2018 | 0.63 (–0.55 to 1.43) | 0.2264 |
| 2018–2021 | 16.84 (6.74 to 21.67) | 0.000001 |
| 2021–2024 | –15.26 (–22.96 to –9.87) | 0.000001 |
| **Men** | | |
| 1999–2018 | 0.30 (–0.81 to 1.18) | 0.5287 |
| 2018–2021 | 18.88 (8.50 to 23.95) | 0.000001 |
| 2021–2024 | –16.74 (–24.51 to –11.88) | 0.000001 |
| **Women** | | |
| 1999–2018 | 0.84 (–0.20 to 1.54) | 0.0832 |
| 2018–2021 | 13.95 (5.37 to 18.01) | 0.00001 |
| 2021–2024 | –13.44 (–20.98 to –8.01) | 0.0004 |
| **NH White** | | |
| 1999–2018 | 0.94 (–0.51 to 1.71) | 0.1108 |
| 2018–2021 | 13.90 (4.84 to 18.18) | 0.0008 |
| 2021–2024 | –12.39 (–21.35 to –7.02) | 0.0048 |
| **NH Black** | | |
| 1999–2018 | –0.93 (–1.77 to –0.24) | 0.0076 |
| 2018–2021 | 20.43 (11.04 to 25.45) | 0.000001 |
| 2021–2024 | –17.30 (–23.73 to –12.32) | 0.000001 |
| **NH Others** | | |
| 1999–2017 | –0.14 (–1.24 to 0.64) | 0.7027 |
| 2017–2020 | 12.66 (4.68 to 16.54) | 0.000001 |
| 2020–2024 | –15.40 (–21.46 to –11.01) | 0.000001 |
| **Hispanic** | | |
| 1999–2018 | –0.23 (–1.87 to 1.16) | 0.7463 |
| 2018–2021 | 30.05 (16.02 to 38.52) | 0.000001 |
| 2021–2024 | –26.83 (–35.03 to –17.02) | 0.000001 |
| **Rural areas** | | |
| 1999–2010 | 0.36 (–2.86 to 1.79) | 0.7331 |
| 2010–2020 | 4.97 (3.65 to 8.26) | 0.000001 |
| **Urban areas** | | |
| 1999–2018 | 0.36 (–0.58 to 0.99) | 0.3571 |
| 2018–2020 | 17.19 (4.29 to 23.44) | 0.000001 |
| **Northeast region** | | |
| 1999–2011 | –1.34 (–3.52 to –0.21) | 0.022 |
| 2011–2021 | 3.02 (1.70 to 9.02) | 0.0064 |
| 2021–2024 | –7.40 (–16.21 to –1.77) | 0.0124 |
| **South region** | | |
| 1999–2018 | 0.77 (–0.55 to 1.75) | 0.2008 |
| 2018–2021 | 20.70 (9.02 to 26.52) | 0.00001 |
| 2021–2024 | –17.61 (–26.38 to –11.91) | 0.000001 |
| **Midwest region** | | |
| 1999–2018 | 0.97 (–0.24 to 1.72) | 0.0812 |
| 2018–2021 | 15.59 (6.11 to 19.96) | 0.000001 |
| 2021–2024 | –14.71 (–23.06 to –9.65) | 0.0012 |
| **West region** | | |
| 1999–2018 | 0.70 (–0.29 to 1.39) | 0.1228 |
| 2018–2021 | 14.71 (5.92 to 18.51) | 0.000001 |
| 2021–2024 | –15.07 (–21.35 to –10.35) | 0.000001 |
| APC = annual percent change; NH = non-Hispanic; * Indicates that the annual percentage change (APC) is significantly different from zero at α = 0.05. AAMR = age-adjusted mortality rate. The data for urbanization was only available till 2020 in the CDC Wonder Database. | | |
|  |
|  | | |  |

| **Supplemental Table 4, Overall and Sex‐Stratified Pneumonia related Age-Adjusted Mortality Rates per 100,000 in Adults with Sepsis, in the United States, 1999 to 2024** | | | |
| --- | --- | --- | --- |
| **Age-Adjusted Rate (95% CI)** | | | |
| **Year** | **Men** | **Women** | **Overall** |
| **1999** | 21.43 (21.08–21.79) | 13.54 (13.32–13.76) | 16.62 (16.43–16.81) |
| **2000** | 20.39 (20.05–20.74) | 12.58 (12.36–12.79) | 15.61 (15.43–15.80) |
| **2001** | 19.76 (19.42–20.09) | 12.47 (12.26–12.68) | 15.31 (15.13–15.49) |
| **2002** | 20.67 (20.33–21.01) | 13.02 (12.81–13.24) | 16.02 (15.83–16.20) |
| **2003** | 20.15 (19.82–20.48) | 12.87 (12.65–13.08) | 15.76 (15.58–15.94) |
| **2004** | 19.59 (19.27–19.91) | 12.63 (12.42–12.84) | 15.40 (15.23–15.58) |
| **2005** | 20.59 (20.27–20.92) | 13.62 (13.41–13.84) | 16.39 (16.21–16.57) |
| **2006** | 20.17 (19.85–20.48) | 13.03 (12.82–13.24) | 15.89 (15.72–16.07) |
| **2007** | 19.95 (19.64–20.26) | 12.86 (12.65–13.06) | 15.71 (15.53–15.88) |
| **2008** | 18.97 (18.67–19.27) | 12.99 (12.79–13.20) | 15.43 (15.26–15.60) |
| **2009** | 18.87 (18.57–19.16) | 12.59 (12.39–12.80) | 15.13 (14.96–15.30) |
| **2010** | 19.00 (18.70–19.29) | 12.48 (12.28–12.67) | 15.14 (14.98–15.31) |
| **2011** | 19.63 (19.34–19.93) | 13.28 (13.08–13.48) | 15.91 (15.74–16.08) |
| **2012** | 18.88 (18.60–19.16) | 12.97 (12.77–13.17) | 15.40 (15.23–15.56) |
| **2013** | 20.17 (19.89–20.46) | 13.82 (13.61–14.02) | 16.47 (16.30–16.64) |
| **2014** | 20.59 (20.30–20.87) | 14.31 (14.10–14.51) | 16.92 (16.75–17.09) |
| **2015** | 22.13 (21.84–22.42) | 15.28 (15.07–15.49) | 18.17 (18.00–18.34) |
| **2016** | 21.97 (21.68–22.25) | 15.13 (14.92–15.34) | 18.05 (17.88–18.22) |
| **2017** | 22.16 (21.88–22.45) | 15.43 (15.22–15.64) | 18.28 (18.11–18.44) |
| **2018** | 22.23 (21.95–22.51) | 15.10 (14.90–15.31) | 18.16 (17.99–18.32) |
| **2019** | 20.88 (20.61–21.15) | 14.23 (14.04–14.43) | 17.07 (16.91–17.23) |
| **2020** | 31.82 (31.50–32.15) | 19.66 (19.43–19.89) | 25.02 (24.83–25.21) |
| **2021** | 36.81 (36.45–37.16) | 22.91 (22.65–23.16) | 29.12 (28.91–29.33) |
| **2022** | 27.00 (26.70–27.30) | 17.44 (17.22–17.65) | 21.55 (21.37–21.73) |
| **2023** | 22.27 (21.99–22.54) | 14.99 (14.79–15.19) | 18.13 (17.97–18.29) |
| **2024** | 22.23 (21.96–22.50) | 15.01 (14.81–15.20) | 18.15 (17.98–18.31) |
| **Total** | **21.86 (20.20–23.51)** | **14.39 (14.18–14.60)** | **17.49 (17.32–17.67)** |

| **Supplemental Table 5, Age Group Stratified Pneumonia related Age-Adjusted Mortality Rates per 100,000 in Adults with Sepsis, in the United States, 1999 to 2024** | | | |
| --- | --- | --- | --- |
| **Age-Adjusted Rate (95% CI)** | | | |
| **Year** | **25-44 years** | **45-65 years** | **65-85+ years** |
| **1999** | 1.56 (1.48–1.65) | 7.13 (6.92–7.34) | 68.8 (67.92–69.67) |
| **2000** | 1.20 (1.13–1.27) | 6.71 (6.51–6.92) | 65.25 (64.40–66.10) |
| **2001** | 1.30 (1.22–1.38) | 6.61 (6.42–6.81) | 63.66 (62.82–64.49) |
| **2002** | 1.25 (1.18–1.33) | 7.05 (6.85–7.25) | 66.6 (65.75–67.45) |
| **2003** | 1.30 (1.22–1.38) | 7.10 (6.90–7.29) | 65.11 (64.28–65.95) |
| **2004** | 1.15 (1.07–1.22) | 7.11 (6.92–7.31) | 63.61 (62.79–64.43) |
| **2005** | 1.25 (1.17–1.32) | 7.51 (7.31–7.71) | 67.75 (66.91–68.58) |
| **2006** | 1.25 (1.18–1.33) | 7.43 (7.24–7.62) | 65.29 (64.48–66.11) |
| **2007** | 1.20 (1.12–1.28) | 7.59 (7.40–7.78) | 64.19 (63.39–64.99) |
| **2008** | 1.35 (1.26–1.43) | 7.65 (7.46–7.84) | 62.3 (61.52–63.08) |
| **2009** | 1.55 (1.47–1.64) | 7.74 (7.55–7.93) | 60.15 (59.39–60.92) |
| **2010** | 1.30 (1.22–1.38) | 7.45 (7.27–7.64) | 61.32 (60.56–62.09) |
| **2011** | 1.39 (1.31–1.47) | 8.17 (7.98–8.36) | 63.76 (62.99–64.52) |
| **2012** | 1.29 (1.21–1.37) | 8.11 (7.92–8.30) | 61.48 (60.74–62.23) |
| **2013** | 1.45 (1.36–1.53) | 8.64 (8.45–8.84) | 65.68 (64.92–66.44) |
| **2014** | 1.45 (1.37–1.54) | 9.20 (9.00–9.40) | 66.96 (66.20–67.72) |
| **2015** | 1.51 (1.42–1.59) | 9.30 (9.10–9.50) | 73.08 (72.30–73.86) |
| **2016** | 1.66 (1.57–1.75) | 9.75 (9.54–9.96) | 71.32 (70.55–72.08) |
| **2017** | 1.61 (1.52–1.70) | 9.57 (9.37–9.77) | 72.89 (72.13–73.65) |
| **2018** | 1.61 (1.52–1.70) | 9.95 (9.75–10.16) | 71.61 (70.87–72.35) |
| **2019** | 1.61 (1.52–1.70) | 9.25 (9.05–9.45) | 67.26 (66.55–67.97) |
| **2020** | 2.65 (2.54–2.77) | 15.98 (15.71–16.24) | 93.68 (92.85–94.51) |
| **2021** | 4.54 (4.39–4.68) | 22.63 (22.32–22.95) | 98.54 (97.68–99.40) |
| **2022** | 2.49 (2.38–2.60) | 13.85 (13.60–14.09) | 80.05 (79.29–80.80) |
| **2023** | 1.96 (1.87–2.06) | 10.33 (10.11–10.54) | 69.98 (69.27–70.68) |
| **2024** | 1.97 (1.88–2.07) | 9.91 (9.70–10.12) | 70.77 (70.06–71.47) |
| **Total** | **1.64 (1.56–1.74)** | **9.29 (9.09–9.50)** | **69.27 (68.48–70.05)** |

| **Supplemental Table 6, Race‐Stratified Pneumonia related Age-Adjusted Mortality Rates per 100,000 in Adults with Sepsis, in the United States, 1999 to 2024** | | | | |
| --- | --- | --- | --- | --- |
| **Age-Adjusted Rate (95% CI)** | | | | |
| **Year** | **NH White** | **NH Black** | **NH Others** | **Hispanic** |
| **1999** | 14.81 (14.61–15.00) | 31.28 (30.37–32.19) | 17.13 (15.85–18.41) | 20.07 (19.06–21.08) |
| **2000** | 14.08 (13.89–14.27) | 29.11 (28.23–29.99) | 15.66 (14.49–16.83) | 17.54 (16.62–18.46) |
| **2001** | 13.76 (13.57–13.94) | 27.90 (27.05–28.75) | 15.79 (14.64–16.94) | 18.41 (17.50–19.33) |
| **2002** | 14.54 (14.35–14.73) | 28.57 (27.71–29.43) | 15.59 (14.49–16.69) | 19.51 (18.59–20.43) |
| **2003** | 14.35 (14.16–14.54) | 27.61 (26.77–28.44) | 15.44 (14.38–16.49) | 18.38 (17.52–19.25) |
| **2004** | 14.01 (13.82–14.19) | 26.90 (26.08–27.72) | 15.58 (14.54–16.63) | 18.23 (17.39–19.07) |
| **2005** | 15.04 (14.85–15.23) | 27.19 (26.37–28.00) | 16.39 (15.37–17.42) | 20.04 (19.19–20.90) |
| **2006** | 14.62 (14.44–14.81) | 25.93 (25.14–26.71) | 16.99 (15.97–18.02) | 18.53 (17.73–19.33) |
| **2007** | 14.36 (14.18–14.55) | 26.18 (25.41–26.96) | 16.10 (15.14–17.06) | 18.43 (17.65–19.20) |
| **2008** | 14.04 (13.86–14.22) | 25.91 (25.15–26.67) | 16.78 (15.83–17.73) | 18.01 (17.27–18.76) |
| **2009** | 13.83 (13.66–14.01) | 24.37 (23.64–25.10) | 16.17 (15.26–17.08) | 18.04 (17.32–18.76) |
| **2010** | 13.89 (13.71–14.06) | 23.75 (23.04–24.46) | 16.20 (15.31–17.08) | 18.06 (17.35–18.77) |
| **2011** | 14.72 (14.54–14.91) | 24.48 (23.77–25.19) | 16.57 (15.71–17.44) | 17.83 (17.16–18.51) |
| **2012** | 14.23 (14.05–14.41) | 23.68 (23.00–24.37) | 16.03 (15.20–16.85) | 17.18 (16.54–17.82) |
| **2013** | 15.29 (15.11–15.48) | 25.07 (24.37–25.76) | 16.38 (15.58–17.18) | 17.94 (17.30–18.58) |
| **2014** | 15.79 (15.61–15.98) | 24.71 (24.03–25.38) | 15.90 (15.14–16.66) | 18.67 (18.04–19.30) |
| **2015** | 17.13 (16.93–17.32) | 26.24 (25.55–26.92) | 16.90 (16.14–17.66) | 18.58 (17.97–19.19) |
| **2016** | 17.19 (17.00–17.38) | 25.33 (24.66–25.99) | 16.05 (15.33–16.76) | 18.20 (17.62–18.79) |
| **2017** | 17.42 (17.23–17.61) | 25.21 (24.56–25.85) | 16.31 (15.61–17.01) | 18.79 (18.20–19.37) |
| **2018** | 17.28 (17.09–17.46) | 25.70 (25.05–26.34) | 15.47 (14.81–16.13) | 18.40 (17.83–18.96) |
| **2019** | 16.29 (16.10–16.47) | 24.10 (23.49–24.72) | 14.92 (14.28–15.55) | 16.67 (16.14–17.19) |
| **2020** | 21.21 (21.00–21.42) | 40.00 (39.22–40.78) | 22.79 (22.04–23.55) | 37.51 (36.76–38.27) |
| **2021** | 25.81 (25.57–26.05) | 42.76 (41.95–43.57) | 23.48 (22.76–24.21) | 40.24 (39.48–41.00) |
| **2022** | 20.18 (19.98–20.39) | 31.61 (30.92–32.30) | 17.71 (17.10–18.32) | 23.68 (23.10–24.27) |
| **2023** | 17.36 (17.18–17.55) | 25.06 (24.45–25.67) | 15.12 (14.57–15.67) | 18.11 (17.60–18.62) |
| **2024** | 17.06 (16.87–17.24) | 26.70 (26.07–27.34) | 15.00 (14.45–15.56) | 18.60 (18.08–19.11) |
| **Total** | **16.09 (14.97–17.21)** | **27.51 (26.77–28.25)** | **16.87 (16.14–17.61)** | **20.18 (19.52–20.84)** |
| **NH** = non-Hispanic. | | | | |

| **Supplemental Table 7, Pneumonia related Age-Adjusted Mortality Rates per 100,000, Stratified by States in Adults with Sepsis, in the United States, 1999 to 2024** | |
| --- | --- |
| **State** | **Age-Adjusted Rate (95% CI)** |
| Alabama | 19.90 (19.58–20.22) |
| Alaska | 10.54 (9.70–11.37) |
| Arizona | 12.92 (12.70–13.15) |
| Arkansas | 19.95 (19.54–20.36) |
| California | 21.07 (20.94–21.20) |
| Colorado | 10.34 (10.09–10.59) |
| Connecticut | 14.68 (14.38–14.98) |
| Delaware | 17.87 (17.18–18.56) |
| District of Columbia | 26.95 (25.84–28.06) |
| Florida | 12.80 (12.68–12.91) |
| Georgia | 18.21 (17.97–18.45) |
| Hawaii | 11.96 (11.51–12.41) |
| Idaho | 9.82 (9.41–10.24) |
| Illinois | 17.02 (16.84–17.20) |
| Indiana | 16.28 (16.03–16.53) |
| Iowa | 10.45 (10.17–10.72) |
| Kansas | 12.62 (12.29–12.94) |
| Kentucky | 25.25 (24.86–25.63) |
| Louisiana | 18.39 (18.06–18.72) |
| Maine | 10.38 (9.97–10.78) |
| Maryland | 19.02 (18.73–19.32) |
| Massachusetts | 15.03 (14.80–15.25) |
| Michigan | 16.32 (16.12–16.52) |
| Minnesota | 8.55 (8.35–8.75) |
| Mississippi | 23.86 (23.40–24.32) |
| Missouri | 15.01 (14.76–15.25) |
| Montana | 8.86 (8.41–9.32) |
| Nebraska | 10.72 (10.35–11.09) |
| Nevada | 24.50 (23.98–25.02) |
| New Hampshire | 10.63 (10.19–11.07) |
| New Jersey | 18.79 (18.57–19.02) |
| New Mexico | 15.53 (15.09–15.98) |
| New York | 18.39 (18.24–18.54) |
| North Carolina | 18.98 (18.75–19.21) |
| North Dakota | 11.49 (10.87–12.11) |
| Ohio | 16.70 (16.52–16.89) |
| Oklahoma | 23.44 (23.04–23.84) |
| Oregon | 8.86 (8.63–9.10) |
| Pennsylvania | 13.77 (13.62–13.92) |
| Rhode Island | 19.75 (19.11–20.38) |
| South Carolina | 20.62 (20.29–20.96) |
| South Dakota | 10.90 (10.35–11.46) |
| Tennessee | 23.67 (23.36–23.98) |
| Texas | 21.52 (21.35–21.68) |
| Utah | 11.06 (10.68–11.44) |
| Vermont | 8.46 (7.90–9.01) |
| Virginia | 15.74 (15.51–15.97) |
| Washington | 13.07 (12.84–13.29) |
| West Virginia | 24.43 (23.90–24.97) |
| Wisconsin | 9.23 (9.03–9.42) |
| Wyoming | 10.56 (9.86–11.27) |

| **Supplemental Table 8, Pneumonia related Age-Adjusted Mortality Rates per 100,000, Stratified by Census Region in Adults with Sepsis, in the United States, 1999 to 2024** | | | | |
| --- | --- | --- | --- | --- |
|  | **Census Region: NorthEast** | **Census Region: Midwest** | **Census Region:  South** | **Census Region:  West** |
| **Year** | **Age-Adjusted Rate (95% CI)** | **Age-Adjusted Rate (95% CI)** | **Age-Adjusted Rate (95% CI)** | **Age-Adjusted Rate (95% CI)** |
| **1999** | 17.28 (16.86–17.70) | 14.46 (14.10–14.82) | 18.36 (18.02–18.70) | 15.46 (15.05–15.87) |
| **2000** | 16.44 (16.03–16.84) | 13.07 (12.73–13.41) | 17.28 (16.95–17.61) | 14.86 (14.46–15.26) |
| **2001** | 16.01 (15.61–16.41) | 12.70 (12.36–13.03) | 17.00 (16.68–17.32) | 14.67 (14.28–15.06) |
| **2002** | 16.82 (16.41–17.23) | 13.27 (12.93–13.62) | 17.76 (17.44–18.09) | 15.25 (14.86–15.65) |
| **2003** | 15.89 (15.49–16.28) | 12.78 (12.44–13.11) | 17.47 (17.15–17.79) | 16.03 (15.63–16.43) |
| **2004** | 15.91 (15.52–16.30) | 12.46 (12.13–12.79) | 16.97 (16.65–17.28) | 15.53 (15.14–15.92) |
| **2005** | 16.39 (15.99–16.79) | 14.07 (13.72–14.42) | 17.75 (17.43–18.06) | 16.72 (16.32–17.12) |
| **2006** | 15.72 (15.33–16.11) | 13.20 (12.86–13.53) | 17.34 (17.03–17.65) | 16.60 (16.20–16.99) |
| **2007** | 15.43 (15.05–15.82) | 13.30 (12.96–13.63) | 17.08 (16.78–17.39) | 16.17 (15.78–16.55) |
| **2008** | 15.09 (14.71–15.46) | 13.45 (13.12–13.78) | 16.52 (16.22–16.81) | 16.08 (15.70–16.46) |
| **2009** | 14.21 (13.85–14.58) | 12.88 (12.55–13.20) | 16.49 (16.20–16.78) | 16.14 (15.77–16.52) |
| **2010** | 14.54 (14.18–14.91) | 12.58 (12.26–12.90) | 16.55 (16.26–16.84) | 15.99 (15.62–16.36) |
| **2011** | 15.09 (14.72–15.46) | 13.85 (13.52–14.18) | 16.93 (16.64–17.21) | 17.03 (16.65–17.40) |
| **2012** | 14.56 (14.20–14.92) | 13.13 (12.81–13.45) | 16.87 (16.59–17.15) | 15.99 (15.63–16.35) |
| **2013** | 15.65 (15.28–16.02) | 14.16 (13.83–14.49) | 18.22 (17.93–18.51) | 16.58 (16.22–16.94) |
| **2014** | 16.32 (15.94–16.70) | 14.53 (14.19–14.86) | 18.65 (18.35–18.94) | 16.86 (16.50–17.22) |
| **2015** | 17.34 (16.95–17.72) | 15.70 (15.36–16.04) | 20.25 (19.95–20.55) | 17.79 (17.43–18.15) |
| **2016** | 16.52 (16.15–16.90) | 15.72 (15.38–16.06) | 20.17 (19.88–20.47) | 17.90 (17.54–18.26) |
| **2017** | 16.18 (15.82–16.55) | 15.79 (15.45–16.12) | 20.82 (20.52–21.11) | 18.16 (17.80–18.52) |
| **2018** | 16.37 (16.00–16.74) | 15.79 (15.46–16.13) | 20.75 (20.46–21.04) | 17.51 (17.16–17.86) |
| **2019** | 15.71 (15.35–16.06) | 15.52 (15.19–15.85) | 19.20 (18.92–19.48) | 16.06 (15.73–16.39) |
| **2020** | 21.27 (20.86–21.69) | 22.09 (21.69–22.48) | 29.19 (28.85–29.53) | 23.67 (23.27–24.06) |
| **2021** | 20.80 (20.39–21.21) | 23.79 (23.37–24.20) | 36.70 (36.31–37.08) | 28.05 (27.61–28.48) |
| **2022** | 17.91 (17.54–18.28) | 18.91 (18.54–19.27) | 25.24 (24.93–25.55) | 20.72 (20.36–21.09) |
| **2023** | 15.67 (15.32–16.02) | 15.81 (15.48–16.14) | 20.71 (20.43–20.99) | 17.85 (17.52–18.19) |
| **2024** | 16.17 (15.81–16.52) | 15.61 (15.28–15.94) | 20.97 (20.69–21.25) | 17.21 (16.88–17.54) |
| **Total** | **16.43 (16.08–16.78)** | **15.23 (14.90–15.56)** | **20.29 (19.98–20.60)** | **17.27 (16.90–17.64)** |

| **Supplemental Table 9, Pneumonia related Age-Adjusted Mortality Rates per 100,000, Stratified by Urban-Rural Classification in Adults with Sepsis, in the United States, 1999 to 2020** | | |
| --- | --- | --- |
| **Age-Adjusted Rate (95% CI)** | | |
| **Year** | **Urban** | **Rural** |
| **1999** | 17.02 (16.81–17.24) | 14.93 (14.52–15.35) |
| **2000** | 15.92 (15.71–16.12) | 14.27 (13.87–14.68) |
| **2001** | 15.55 (15.34–15.75) | 14.35 (13.95–14.75) |
| **2002** | 16.29 (16.09–16.50) | 14.76 (14.35–15.17) |
| **2003** | 15.95 (15.75–16.15) | 14.82 (14.42–15.23) |
| **2004** | 15.70 (15.50–15.90) | 14.12 (13.72–14.51) |
| **2005** | 16.66 (16.46–16.86) | 15.40 (14.99–15.82) |
| **2006** | 16.11 (15.91–16.31) | 14.99 (14.59–15.40) |
| **2007** | 15.83 (15.64–16.02) | 15.08 (14.68–15.48) |
| **2008** | 15.61 (15.42–15.79) | 14.61 (14.21–15.00) |
| **2009** | 15.17 (14.98–15.35) | 15.02 (14.62–15.42) |
| **2010** | 15.17 (14.99–15.35) | 15.14 (14.75–15.54) |
| **2011** | 15.85 (15.66–16.03) | 16.26 (15.85–16.68) |
| **2012** | 15.28 (15.10–15.46) | 16.16 (15.76–16.57) |
| **2013** | 16.25 (16.07–16.43) | 17.69 (17.27–18.12) |
| **2014** | 16.63 (16.44–16.81) | 18.55 (18.12–18.99) |
| **2015** | 17.80 (17.62–17.99) | 20.14 (19.70–20.59) |
| **2016** | 17.60 (17.42–17.79) | 20.33 (19.88–20.77) |
| **2017** | 17.77 (17.59–17.95) | 20.90 (20.45–21.35) |
| **2018** | 17.67 (17.49–17.85) | 20.77 (20.32–21.22) |
| **2019** | 16.49 (16.32–16.66) | 20.18 (19.75–20.62) |
| **2020** | 24.50 (24.30–24.71) | 27.74 (27.22–28.25) |
| **Total** | **16.75 (16.57–16.93)** | **17.51 (17.11–17.90)** |
| The data for urbanization was only available till 2020 in the CDC Wonder Database. | | |
|  |
